# Supplementary material for: Improved CO 2 capture performance of CeO 2 -doped CaO-based pellets: effects of particle size and steam treatment
Source: Royal Society of Chemistry journal article supplement (doi:10.1039/d5im00017c), 2025-01-01
Supplement: d5im00017c1.pdf [file d5im00017c1.pdf]

## Supplementary Information

**Title:** Improved CO<sub>2</sub> capture performance of CeO<sub>2</sub>-doped CaO-based pellets: effects of particle size and steam treatment

**Author:** Yong Li<sup>a</sup>, Wuhao Sun<sup>a</sup>, Xilei Liu<sup>a</sup>, Jian Chen<sup>a, \*</sup>, Hedan Tang<sup>a</sup>, Youshi Li<sup>a</sup>, Mingdi Li<sup>a</sup>, Lunbo Duan<sup>b, \*</sup>

<sup>a</sup> School of Automotive Engineering, Changshu Institute of Technology, Changshu 215500, China

<sup>b</sup> Key Laboratory of Energy Thermal Conversion and Control, Ministry of Education, School of Energy and Environment, Southeast University, Nanjing 210096, China

\*Email: chenjian@cslg.edu.cn; duanlunbo@seu.edu.cn

### Results and discussion

**Figure S1** CO<sub>2</sub> capture performance of CaO-PO and 20Ce-CaO-PO over ten cycles in a vertical fixed bed reactor.

**Figure S2** XRD patterns of 20Ce-CaO-PE-4 after steam hydration at different temperatures.

**Table S1** N<sub>2</sub> physisorption results of fresh CeO<sub>2</sub>-doped CaO-based pellets.

**Table S2** Carbonation performance of the CaO-based pellets prepared in this study and those reported previously.

## Results and discussion

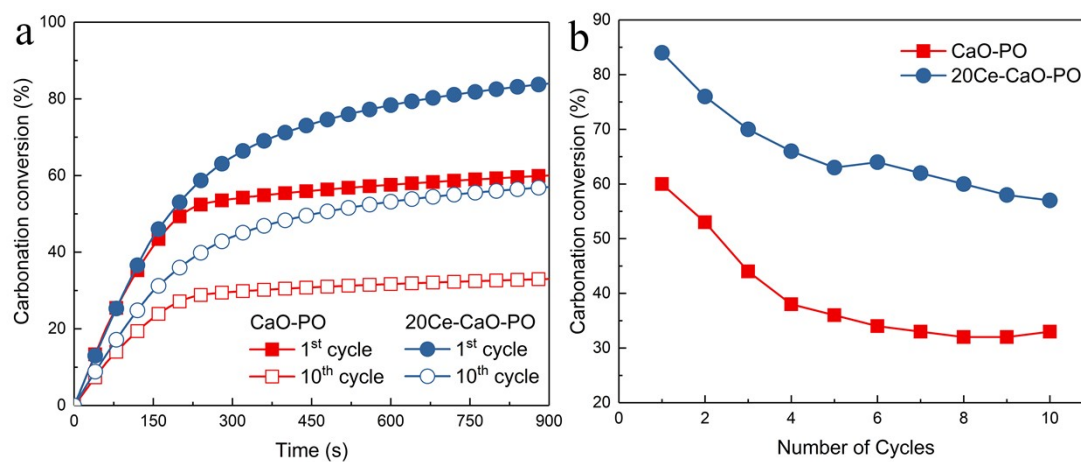

**Figure S1** CO<sub>2</sub> capture performance of CaO-PO and 20Ce-CaO-PO over ten cycles in a vertical fixed bed reactor. (a) Carbonation conversion as a function of cycle number, (b) carbonation conversion as a function of time. CeO<sub>2</sub> doping significantly improved CO<sub>2</sub> sorption rate. Reaction condition: calcination: N<sub>2</sub>, 850 °C, 10 min; carbonation: 15% CO<sub>2</sub>, 85% N<sub>2</sub>, 650 °C, 15 min.

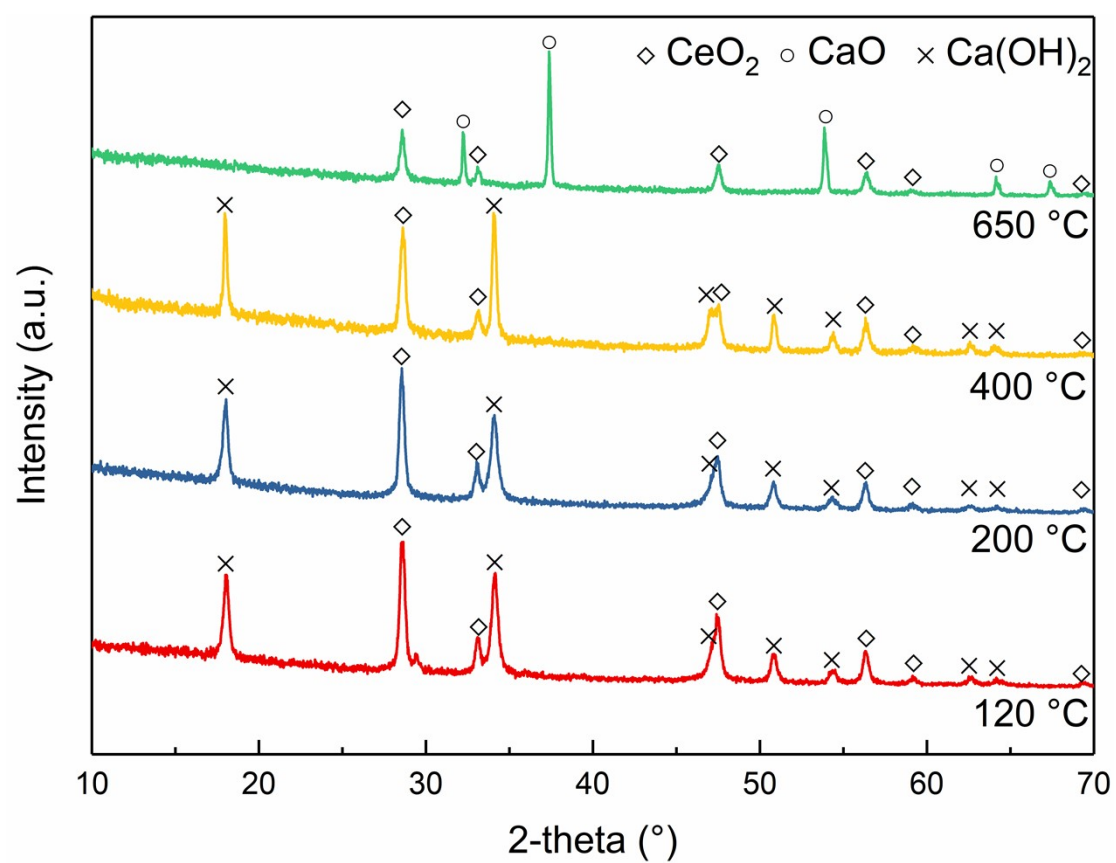

**Figure S2** XRD patterns of 20Ce-CaO-PE-4 after steam hydration at different temperatures.

**Table S1** N<sub>2</sub> physisorption results of fresh CeO<sub>2</sub>-doped CaO-based pellets.

| Sample              | Specific surface area (m <sup>2</sup> /g) | Pore volume (cm <sup>3</sup> /g) |
|---------------------|-------------------------------------------|----------------------------------|
| 20Ce-CaO-PO         | 9.7                                       | 0.016                            |
| 20Ce-CaO-PE-1       | 6.4                                       | 0.011                            |
| 20Ce-CaO-PE-2       | 6.4                                       | 0.011                            |
| 20Ce-CaO-PE-3       | 6.3                                       | 0.011                            |
| Fresh 20Ce-CaO-PE-4 | 6.1                                       | 0.010                            |

**Table S2** Carbonation performance of the CaO-based pellets prepared in this study and those reported previously.

| Testing condition                                        |                                                           | Cycles | Carbonation conversion (%) |       | Ref.         |
|----------------------------------------------------------|-----------------------------------------------------------|--------|----------------------------|-------|--------------|
| Calcination                                              | Carbonation                                               |        | Initial                    | Final |              |
| N <sub>2</sub> , 850 °C, 5 min                           | 15% CO <sub>2</sub> , 85% N <sub>2</sub> , 650 °C, 25 min | 25     | 72                         | 20    | <sup>1</sup> |
| N <sub>2</sub> , 850 °C, 10 min                          | 15% CO <sub>2</sub> , 85% N <sub>2</sub> , 650 °C, 20 min | 17     | 51.9                       | 30.2  | <sup>2</sup> |
| N <sub>2</sub> , 900 °C, 10 min                          | 15% CO <sub>2</sub> , 85% N <sub>2</sub> , 650 °C, 30 min | 17     | 76                         | 21    | <sup>3</sup> |
| N <sub>2</sub> , 850 °C, 10 min                          | CO <sub>2</sub> , 850 °C, 10 min                          | 30     | 45                         | 30    | <sup>4</sup> |
| 40% CO <sub>2</sub> , 60% N <sub>2</sub> , 900 °C, 5 min | 15% CO <sub>2</sub> , 85% N <sub>2</sub> , 650 °C, 30 min | 25     | 68                         | 29    | <sup>5</sup> |
| steam, 850 °C, 10 min                                    | 15% CO <sub>2</sub> , 85% N <sub>2</sub> , 650 °C, 15 min | 20     | 75.1                       | 29.9  | In this work |

## References:

1. Y. Zhang, X. Gong, X. Chen, L. Yin, J. Zhang and W. Liu, Performance of synthetic CaO-based sorbent pellets for CO<sub>2</sub> capture and kinetic analysis, *Fuel*, 2018, **232**, 205-214.
2. K. Ma, J. Sun, P. Kong, R. Sun, K. Li, Z. Zhou and C. Zhao, Core-shell structured CaO-based pellets with enhanced cyclic CO<sub>2</sub> capture performance, *Journal of Environmental Chemical Engineering*, 2024, **12**, 113033.
3. J. Sun, W. Liu, Y. Hu, M. Li, X. Yang, Y. Zhang and M. Xu, Structurally Improved, Core-in-Shell, CaO-Based Sorbent Pellets for CO<sub>2</sub> Capture, *Energy & Fuels*, 2015, **29**, 6636-6644.
4. V. Manovic and E. J. Anthony, CaO-based pellets supported by calcium aluminate cements for high-temperature CO<sub>2</sub> capture, *Environmental Science & Technology*, 2009, **43**, 7117-7122.
5. J. Sun, C. Liang, W. Wang and W. Liu, Screening of Naturally Al/Si-Based Mineral Binders to Modify CaO-Based Pellets for CO<sub>2</sub> Capture, *Energy & Fuels*, 2017, **31**, 14070-14078.
